1 Binaural fusion involves weak interaural suppression

2

3 Baker, D.H.<sup>1,4</sup>, Vilidaite, G.<sup>1</sup>, McClarnon, E.<sup>1</sup>, Valkova, E.<sup>1</sup> & Millman, R.E.<sup>2,3</sup>

4

5 <sup>1</sup> Department of Psychology, University of York, Heslington, York, YO10 5DD, UK

6 <sup>2</sup> Manchester Centre for Audiology and Deafness, Division of Human Communication,  
7 Hearing and Deafness, School of Health Sciences, Faculty of Biology, Medicine and Health,  
8 University of Manchester, Manchester M13 9PL, UK

9 <sup>3</sup> NIHR Manchester Biomedical Research Centre, Central Manchester University Hospitals  
10 Foundation Trust, Manchester Academic Health Science Centre, M13 9WL, UK.

11 <sup>4</sup> email: daniel.baker@york.ac.uk

12

13 **Abstract**

14

15 The brain combines sounds from the two ears, but what is the algorithm used to achieve  
16 this fusion of signals? Here we take a model-driven approach to interpret both  
17 psychophysical increment detection thresholds and steady-state electrophysiology (EEG)  
18 data to reveal the architecture of binaural combination for amplitude modulated tones.  
19 Increment thresholds followed a 'dipper' shaped function of pedestal modulation depth,  
20 and were consistently lower for binaural than monaural presentation. The EEG responses  
21 were greater for binaural than monaural presentation, and when a modulated masker was  
22 presented to one ear, it produced only weak suppression of the signal presented to the  
23 other ear. Both data sets were well-fit by a computational model originally derived for visual  
24 signal combination, but with suppression between the two channels (ears) being much  
25 weaker than in binocular vision. We suggest that the distinct ecological constraints on vision  
26 and hearing can explain this difference, if it is assumed that the brain avoids over-  
27 representing sensory signals originating from a single object. These findings position our  
28 understanding of binaural summation in a broader context of work on sensory signal  
29 combination in the brain, and delineate the similarities and differences between vision and  
30 hearing.

31

32 *Keywords: binaural fusion, EEG, amplitude modulation*

33

## 34 Introduction

35

36 The auditory system integrates information across the two ears. This operation confers  
37 several benefits, including increased sensitivity to low intensity sounds [1] and inferring  
38 location and motion direction of sound sources based on interaural time differences [2]. In  
39 some animals, such as bats and dolphins, echolocation can be precise enough to permit  
40 navigation through the environment, and there are reports of visually impaired humans  
41 using a similar strategy [3,4], which requires both ears [5]. But what precisely is the  
42 algorithm that governs the combination of sounds across the ears? The nonlinearities  
43 inherent in sensory processing mean that simple linear signal addition is unlikely. This study  
44 uses complementary techniques (psychophysics, steady-state electroencephalography (EEG)  
45 and computational modelling) to probe the neural operations that underpin binaural fusion  
46 of amplitude modulated signals.

47

48 Classical psychophysical studies demonstrated that the threshold for detecting a very faint  
49 tone is lower when the tone is presented binaurally versus monaurally. Shaw et al. [1]  
50 presented signals to the two ears that were equated for each ear's individual threshold  
51 sound level when presented binaurally. This accounted for any differences in sensitivity (or  
52 audibility), and revealed that summation (the improvement in sensitivity afforded by  
53 binaural presentation) was approximately 3.6 dB (a factor of 1.5). Subsequent studies have  
54 provided similar or slightly lower values [i.e. 6–8], and there is general agreement that two  
55 ears are better than one at detection threshold [9]. This difference persists above threshold,  
56 with loudness discrimination performance being better binaurally than monaurally [10].  
57 Furthermore, binaural sounds are perceived as being slightly louder than monaural sounds,  
58 though typically less than twice as loud [11–14].

59

60 When a carrier stimulus (typically either a pure-tone or broadband noise) is modulated in  
61 amplitude, neural oscillations at the modulation frequency can be detected at the scalp [15–  
62 18], being typically strongest at the vertex in EEG recordings [19]. This steady-state auditory  
63 evoked potential (SSAEP) is typically greatest around 40 Hz [19,20] and increases  
64 monotonically with modulation depth [17,18]. For low signal modulation frequencies  
65 (<55Hz), brain responses are thought to reflect cortical processes [15,19–21]. The SSAEP has  
66 been used to study binaural interactions, showing evidence of interaural suppression  
67 [22,23] and increased responses from binaurally fused stimuli [17,21].

68

69 The perception of amplitude-modulated stimuli shows similar properties to pure-tones in  
70 terms of binaural processing. For example, binaural sensitivity is better than monaural  
71 sensitivity [24,25], and the perceived modulation depth is approximately the average of the  
72 two monaural modulations over a wide range [26]. Presenting two different modulation  
73 frequencies to the left and right ears can produce the percept of a 'binaural beat' pattern at  
74 the difference intermodulation frequency (the highest minus the lowest frequency),  
75 suggesting that the two modulation frequencies are combined centrally [27]. Finally,  
76 increment detection of amplitude modulation [28] follows the "near miss to Weber's law"  
77 (i.e. Weber fractions for discrimination decrease as a function of pedestal level) typically  
78 reported for loudness discrimination [29]. However, despite these observations, detailed  
79 investigation and modelling of the binaural processing of amplitude-modulated tones is  
80 lacking.

81

82 Computational predictions for both psychophysical and electrophysiological results can be  
83 obtained from parallel work that considers the combination of visual signals across the left  
84 and right eyes. In several previous studies, a single model of binocular combination has  
85 been shown to successfully account for the pattern of results from psychophysical contrast  
86 discrimination and matching tasks [30,31], as well as steady-state EEG experiments [32]. The  
87 model, shown schematically in Figure 1a, takes contrast signals (sinusoidal modulations of  
88 luminance) from the left and right eyes, which mutually inhibit each other before being  
89 summed as follows:

90

$$91 \quad resp = \frac{C_L^p}{Z^q + C_L^q + \omega C_R^q} + \frac{C_R^p}{Z^q + C_R^q + \omega C_L^q} , \quad (1)$$

92

93 where  $C_L$  and  $C_R$  are the contrast signals in the left and right eyes respectively,  $\omega$  is the  
94 weight of interocular suppression,  $Z$  is a constant governing the sensitivity of the model, and  
95  $p$  and  $q$  are exponents with the typical constraint that  $p > q$ . In all experiments in which the  
96 two signals have the same visual properties, the weight of interocular suppression ( $\omega$ ) has a  
97 value around 1.

98

99 Whereas vision studies typically modulate luminance relative to a mean background (DC)  
100 level (i.e. contrast), in hearing studies the amplitude modulation of a carrier waveform can  
101 be used to achieve the same effect. We can therefore test empirically whether binaural  
102 signal combination is governed by the same basic algorithm as binocular signal combination  
103 by replacing the  $C$  terms in equation 1 with modulation depths for amplitude modulated  
104 (AM) stimuli.

105

106 The response of the model for different combinations of inputs is shown in Figure 1b, with  
107 predictions being invariant to the sensory modality (hearing or vision). In the  
108 monaural/monocular (“mon”) condition (blue), signals are presented to one channel only. In  
109 the binaural/binocular (“bin”) condition (red) equal signals are presented to both channels.  
110 In the dichotic/dichoptic (“dich”) condition (green) a signal is presented to one channel,  
111 with a fixed high amplitude ‘masker’ presented to the other channel throughout. For  $\omega=1$ ,  
112 the mon and bin conditions produce similar outputs, despite a doubling of the input (two  
113 channels vs one). This pattern of responses is consistent with the amplitudes recorded from  
114 steady-state visual evoked potential experiments testing binocular combination in humans  
115 [32].

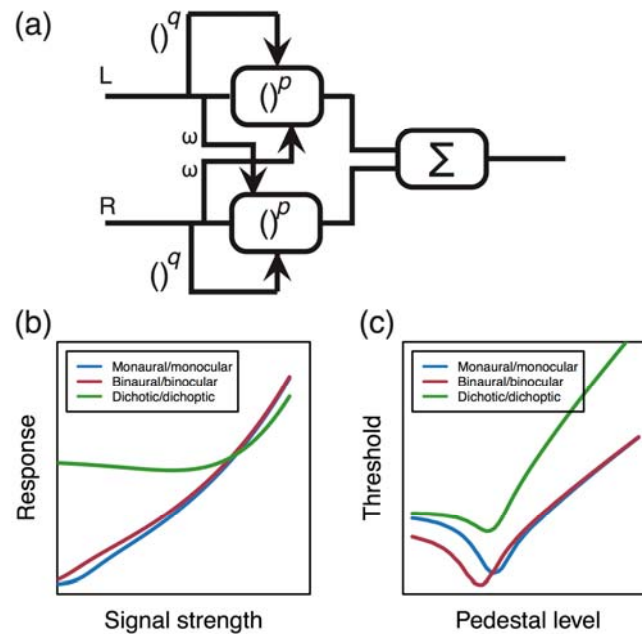

116  
 117 Figure 1: Schematic of signal combination model and qualitative predictions. Panel (a) shows a diagram of the  
 118 signal combination model, which features weighted inhibition between left and right channels before signal  
 119 combination ( $\Sigma$ ). Panel (b) shows the predictions of this model for various combinations of inputs to the left  
 120 and right channels, as described in the text. Predictions for discrimination of increases in modulation depth for  
 121 similar conditions are shown in panel (c).  
 122

123 Figure 1c shows the gradients of the signal vs response functions from Figure 1b. These  
 124 functions predict the results for psychophysical increment detection experiments in which  
 125 thresholds are measured for discriminating changes in the level of a 'pedestal' stimulus.  
 126 Such experiments measure the gradient because thresholds are defined as the horizontal  
 127 translation required to produce a unit increase vertically along the functions in Figure 1b.  
 128 The mon and bin functions converge at higher pedestal levels, and the dich function shows  
 129 strong threshold elevation owing to the suppression between the two channels (when  $\omega=1$ ).  
 130 Again, this pattern of functions is consistent with those reported in psychophysical studies  
 131 of binocular vision [31].  
 132

133 The present study uses two complementary methods – psychophysical amplitude  
 134 modulation depth discrimination, and steady-state auditory evoked potentials – to  
 135 investigate binaural signal combination in the human brain. The results are compared with  
 136 the predictions of the computational model [31,32] described above (see Figure 1) and  
 137 modifications to the model are discussed in the context of functional constraints on the  
 138 human auditory system. This principled, model-driven approach positions our  
 139 understanding of binaural summation in a broader context of work on sensory signal  
 140 combination in the brain.  
 141

## 142 **Methods**

143

### 144 *Apparatus & stimuli*

145

146 Auditory stimuli were presented over Sennheiser (HD 280 pro) headphones (Sennheiser  
147 electronic GmbH, Wedemark, Germany), and had an overall presentation level of 80dB SPL.  
148 An AudioFile device (Cambridge Research Systems Ltd., Kent, UK) was used to generate the  
149 stimuli at a sample rate of 44100Hz. Stimuli consisted of a 1-kHz pure-tone carrier,  
150 amplitude-modulated at a modulation frequency of either 40Hz or 35Hz (see Figure 2),  
151 according to the equation:

$$w = 0.5 * (1 + m * \cos(f_m * t * 2\pi + \pi)) * \sin(f_c * t * 2\pi) \quad (2)$$

152  
153  
154 where  $f_m$  is the modulation frequency in Hz,  $f_c$  is the carrier frequency in Hz,  $t$  is time in  
155 milliseconds, and  $m$  is the modulation depth, scaled from 0-1 (though hereafter expressed  
156 as a percentage,  $100 * m$ ). We chose not to compensate for overall stimulus power [as is  
157 often done for amplitude modulated stimuli, e.g. ,33] for two reasons. First, such  
158 compensation mostly affects performance at much higher modulation frequencies than we  
159 used here [e.g. see Figure A1 of 34]. Second, it makes implicit assumptions about the cues  
160 used by the participant in the experiment. We prefer to make such cues explicit in our  
161 computational modelling. The modulation depth and the assignments of modulation  
162 frequencies delivered to the left and right ears were varied parametrically across different  
163 conditions of the experiments.  
164

165  
166 EEG data were recorded with a sample frequency of 1 kHz using a 64-electrode Waveguard  
167 cap and an ANT Neuroscan (ANT Neuro, Netherlands) amplifier. Signals were digitised and  
168 stored on the hard drive of a PC for later offline analysis. Stimulus onset was coded on the  
169 EEG trace using low latency digital triggers.

### 170 171 *Psychophysical procedures*

172  
173 In the psychophysics experiment, participants heard two amplitude-modulated stimuli  
174 presented sequentially using a two-alternative-forced-choice (2AFC) design. The stimulus  
175 duration was 500ms, with a 400ms interstimulus interval (ISI) and a minimum inter-trial  
176 interval of 500ms. One stimulus was the standard interval, consisting of the pedestal  
177 modulation depth only. The other stimulus was the signal interval, which comprised the  
178 pedestal modulation depth with an additional increment.

179  
180 The presentation order of the standard and signal intervals was randomised, and  
181 participants were instructed to indicate the interval which they believed contained the  
182 target using a two-button mouse. A coloured square displayed on the computer screen  
183 indicated accuracy (green for correct, red for incorrect). The size of the target increment  
184 was determined by a pair of 3-down-1-up staircases, with a step size of 3 dB, which  
185 terminated after the lesser of 70 trials or 12 reversals. The percentage of correct trials at  
186 each target modulation depth was used to fit a cumulative log-Gaussian psychometric  
187 function to estimate the target modulation that yielded a performance level of 75% correct,  
188 which was defined as the threshold. Each participant completed three repetitions of the  
189 experiment, producing an average of 223 trials per condition (and an average of 7125 trials  
190 in total per participant).

191

192 Four binaural arrangements of target and pedestal were tested, at 8 pedestal modulation  
193 depths ( $m = 0, 1, 2, 4, 8, 16, 32$  &  $64\%$ ). The arrangements are illustrated schematically in  
194 Figure 2a, and were interleaved within a block at a single pedestal level, so that on each trial  
195 participants were not aware of the condition being tested. Note that in all conditions the  
196 carrier was presented to both ears, whether or not it was modulated by the pedestal and/or  
197 target. In the monaural condition, the pedestal and target modulations were presented to  
198 one ear, with the other ear hearing only the unmodulated carrier. The modulated stimulus  
199 was assigned randomly to an ear on each trial. In the binaural condition, the pedestal and  
200 target modulations were presented to both ears (in phase). In the dichotic condition, the  
201 pedestal modulation went to one ear and the target modulation to the other ear. Finally, in  
202 the half-binaural condition, the pedestal modulation was played to both ears, but the target  
203 modulation to only one ear. In all conditions, the modulation frequency for the pedestal and  
204 the target was  $40\text{Hz}$ .

205

#### 206 *EEG procedure*

207

208 In the EEG experiment, participants heard 11-s sequences of amplitude-modulated stimuli  
209 interspersed with silent periods of 3 seconds. There were five signal modulation depths ( $m =$   
210  $6.25, 12.5, 25, 50$  &  $100\%$ ) and six binaural conditions, as illustrated in Figure 2b. In the first  
211 three conditions, a single modulation frequency ( $40\text{ Hz}$ ,  $F1$ ) was used. In the monaural  
212 condition, the modulated 'signal' tone was presented to one ear, and the unmodulated  
213 carrier was presented to the other ear. In the binaural condition, the signal modulation was  
214 presented to both ears. In the dichotic condition, the signal modulation was presented to  
215 one ear, and a modulated masker with a modulation depth of  $m = 50\%$  was presented to  
216 the other ear. The remaining three conditions involved modulation at a second modulation  
217 frequency ( $35\text{ Hz}$ ,  $F2$ ). In the cross-monaural condition,  $F2$  was presented to one ear as the  
218 signal, and the unmodulated carrier was presented to the other ear ( $F1$  was not presented  
219 to either ear). In the cross-binaural condition,  $F1$  was presented to one ear and  $F2$  was  
220 presented to the other ear but the modulation depth of  $F1$  and  $F2$  was the same. In the  
221 cross-dichotic condition,  $F1$  was presented to one ear, and  $F2$  ( $m = 50\%$ ) was presented to  
222 the other ear. The order of conditions was randomised, and each condition was repeated  
223 ten times, counterbalancing the presentation of stimuli to the left and right ears as  
224 required.

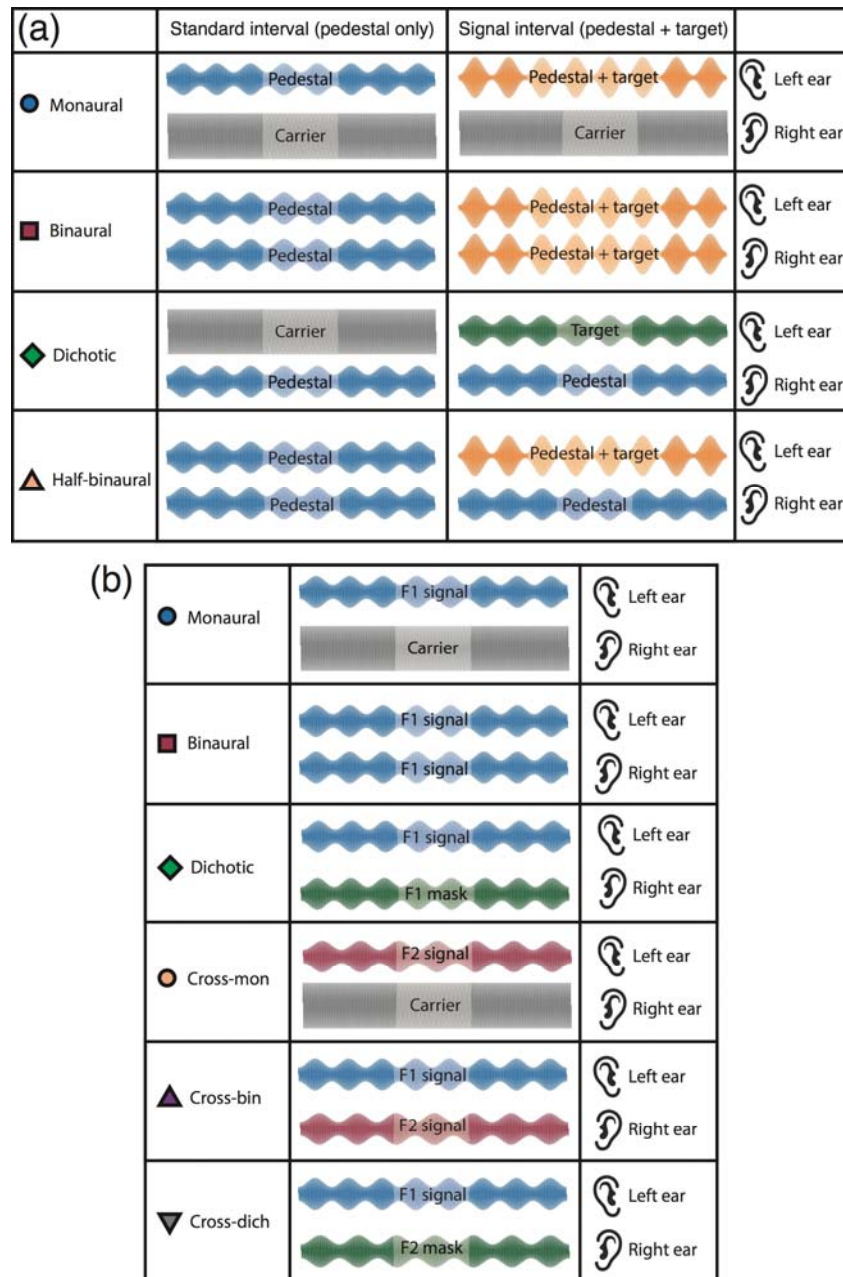

225  
 226 Figure 2: Summary of conditions and stimuli. Panel (a) illustrates the arrangement of pedestal and target  
 227 modulations for the psychophysics experiment in the standard (pedestal only) interval (left) and signal  
 228 (pedestal + target) interval (right) for four different interaural arrangements (rows). In all cases, the  
 229 modulation frequency was 40 Hz and participants were asked to indicate the interval containing the target. A  
 230 range of pedestal levels were tested, with target modulation depths determined by a staircase algorithm.  
 231 Panel (b) shows stimulus arrangements for six conditions in the EEG experiment. Stimuli designated 'signal'  
 232 had different modulation depths in different conditions, whereas stimuli designated 'masker' had a fixed  
 233 modulation depth ( $m = 50\%$ ) at all signal levels. In all experiments stimulation was counterbalanced across the  
 234 two ears, so the left ear/right ear assignments here are nominal.

235  
 236 EEG data for each trial at each electrode were then analysed offline. The first second  
 237 following stimulus presentation was discarded to eliminate onset transients, and the  
 238 remaining ten seconds were Fourier transformed using the fast Fourier transform function  
 239 in Matlab (version 8.5, The MathWorks, Inc., Natick, MA). The dependent variables were the

240 signal-to-noise ratios (SNR) at the Fourier components corresponding to the two modulation  
241 frequencies used in the experiment (40 Hz, F1 and 35 Hz, F2). This was calculated by dividing  
242 the amplitude at the frequency of interest (35 or 40 Hz) by the average amplitude in the  
243 surrounding 10 bins ( $\pm 0.5$  Hz in steps of 0.1 Hz). The SNRs for each of the ten repetitions of  
244 each condition were then averaged coherently (taking into account the phase angle). This  
245 coherent averaging procedure minimises noise contributions (which have random phase  
246 across repetitions), and previous studies [e.g. 32] have indicated that this renders artifact  
247 rejection procedures unnecessary. The absolute SNRs (discarding phase information) were  
248 then used to average across participants.

249

## 250 *Participants*

251

252 Three participants (one male) completed the psychophysics experiment, and twelve  
253 participants (3 male) completed the EEG experiment. All had self-reported normal hearing,  
254 and provided written informed consent. Experimental procedures were approved by the  
255 ethics committee of the Department of Psychology, University of York. Data are available  
256 online at: <https://doi.org/10.6084/m9.figshare.5955904>.

257

## 258 **Results**

259

### 260 *Discrimination results are consistent with weak interaural suppression*

261

262 The results of the amplitude modulation depth discrimination experiment are shown in  
263 Figure 3 for 3 participants (panels a-c). Although there were differences in absolute  
264 sensitivity between the participants (for example P2 has higher thresholds than P1 and P3),  
265 the overall pattern of thresholds was remarkably consistent across all three participants and  
266 is shown averaged in Figure 3d. A 4 (condition) x 8 (pedestal level) repeated measures  
267 ANOVA found significant main effects of condition ( $F=10.31$ ,  $p<0.01$ ,  $\eta_p^2=0.84$ ) and pedestal  
268 level ( $F=6.55$ ,  $p<0.01$ ,  $\eta_p^2=0.77$ ), and a significant interaction between the two factors  
269 ( $F=2.46$ ,  $p<0.01$ ,  $\eta_p^2=0.55$ ).

270

271 When the results are plotted as thresholds on logarithmic axes, the results for binaurally  
272 presented modulations (red squares in Figure 3a-d) followed a ‘dipper’ shape [35], with  
273 thresholds decreasing from an average of around 4% at detection threshold to around 1%  
274 on a pedestal of 8% (a facilitation effect). At higher pedestal modulations, thresholds  
275 increased to around 16%, indicating a masking effect. Thresholds for the monaural  
276 modulation (blue circles in Figure 3a-d) followed a similar pattern, but were shifted  
277 vertically by an average factor of 1.77 across all pedestal levels. There was no evidence that  
278 monaural and binaural dipper handles converged at higher pedestal contrasts. At detection  
279 threshold (pedestal  $m=0$ ), the average summation between binaural modulation and the  
280 three other conditions (which are identical in the absence of a pedestal) was a factor of 1.28  
281 (2.14 dB). This level of summation is above that typically expected from probabilistic  
282 combination of independent inputs [36], and implies the presence of physiological  
283 summation between the ears.

284



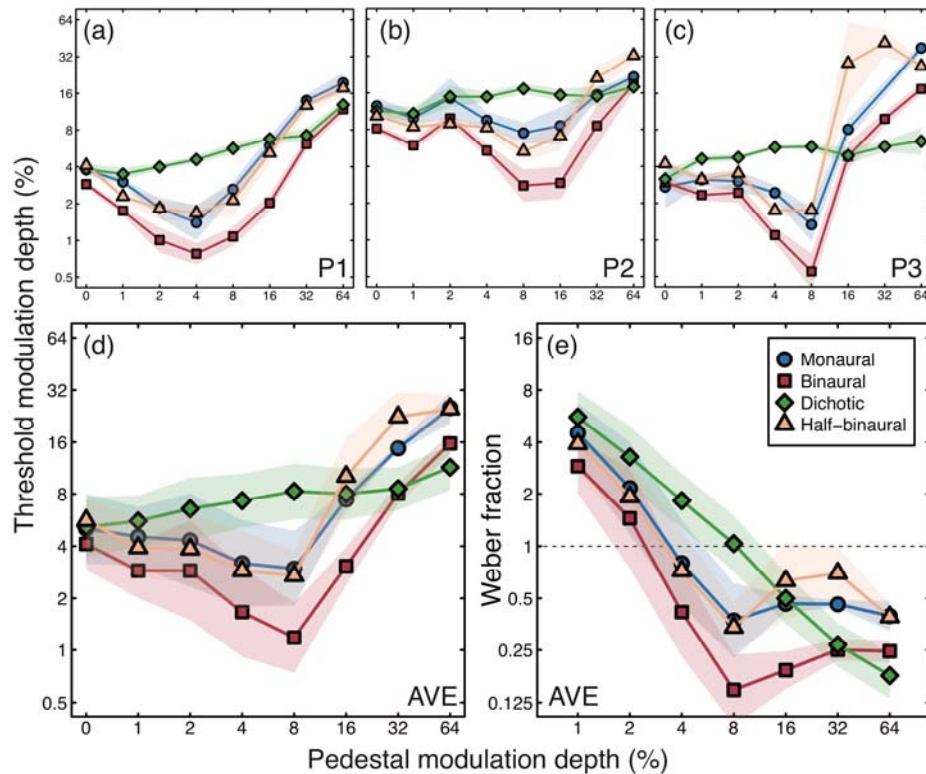

285

286

287

288

289

290

291

292

293

294

295

296

297

298

299

300

301

302

303

304

305

306

307

308

309

310

311

312

Figure 3: Results of the psychophysical AM depth discrimination experiment for three participants (panels a-c) and their average (panel d). Shaded regions give  $\pm 1$  Standard Error (SE) of the Probit fit in panels a-c and  $\pm 1$ SE across participants in panel d. Arrangements of pedestal and target in different conditions were as illustrated in Figure 2a. It was not possible to measure a threshold for participant 3 in the monaural condition at 32% modulation depth, so this data point was omitted from panel c and when calculating the average in panel d. The data were replotted as Weber fractions in panel e by dividing each threshold by its accompanying pedestal modulation depth.

Dichotic presentation (pedestal modulation in one ear and target modulation in the other) elevated thresholds by a factor of 2.21 at the highest pedestal modulation depths (green diamonds in Figure 3a-d), compared to baseline (0% pedestal modulation). This masking effect was substantially weaker than is typically observed for dichoptic pedestal masking in vision (see Figure 1a), which can elevate thresholds by around a factor of 30 [31]. The half-binaural condition (orange triangles in Figure 3a-d), where the pedestal was presented to both ears, but the target only to one ear, was not appreciably different from the monaural condition, with thresholds greater than in the binaural condition by a factor of 1.86 on average.

These results can be converted to Weber fractions by dividing the threshold increments by the pedestal modulation depths, for pedestals  $>0\%$ . These values are shown for the average data in Figure 3e. At lower pedestal modulation depths ( $<8\%$ ), Weber fractions decreased as a function of pedestal level. At pedestal modulations above 8%, the binaural Weber fractions (red squares) plateaued at around 0.25, whereas the monaural and half-binaural Weber fractions (blue circles and orange triangles) plateaued around 0.5. The dichotic Weber fractions (green diamonds) continued to decrease throughout. Thus, the “near miss to Weber’s law” behaviour occurred over the lower range of pedestal modulations depths, but more traditional Weber-like behaviour was evident at higher pedestal levels. The

313 exception is the dichotic condition, where the “near miss” behaviour was evident  
314 throughout.

315

316 Overall, this pattern of results is consistent with a weak level of interaural suppression  
317 between the left and right ears. This accounts for the lack of convergence of monaural and  
318 binaural dipper handles at high pedestal levels, and the relatively minimal threshold  
319 elevation in the dichotic masking condition. Our second experiment sought to measure  
320 modulation response functions directly using steady-state EEG to test whether this weak  
321 suppression is also evident in cortical responses.

322

### 323 *Direct neural measures of binaural combination*

324

325 Steady-state EEG signals were evident over central regions of the scalp, at both modulation  
326 frequencies tested, and for both monaural and binaural modulations (Figure 4). In  
327 particular, there was no evidence of laterality effects for monaural presentation to one or  
328 other ear. We therefore averaged steady-state SNRs across a region-of-interest (ROI)  
329 comprising nine fronto-central electrodes (Fz, F1, F2, FCz, FC1, FC2, Cz, C1, C2, highlighted  
330 white in Figure 4) to calculate modulation response functions.

331

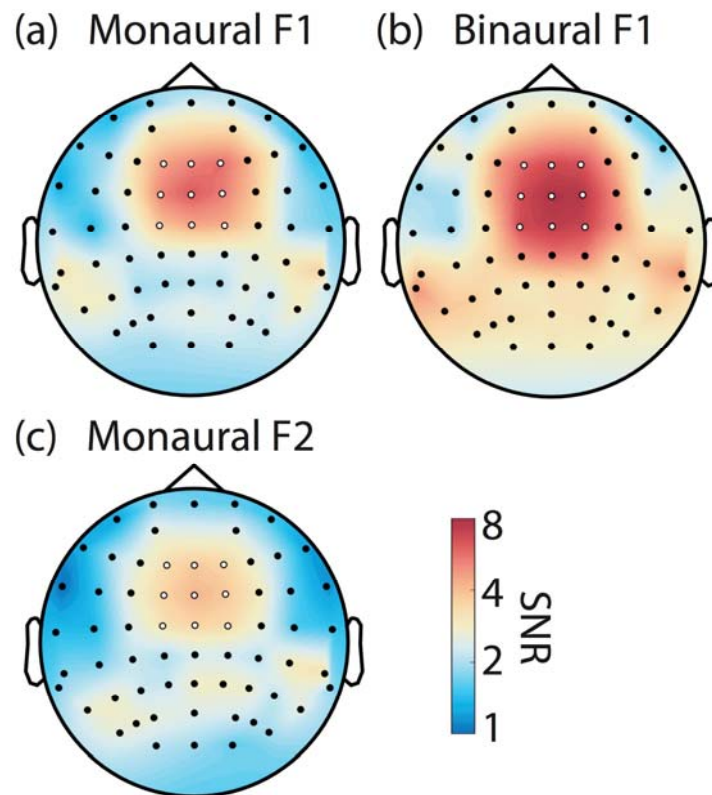

332

333 Figure 4: SNRs across the scalp at either 40 Hz (F1, panel a,b) or 35 Hz (F2, panel c). In panels a,c the signal  
334 modulation was presented to one ear (averaged across left and right), in panel b the modulation was  
335 presented to both ears. Note the log-scaling of the colour map. Dots indicate electrode locations, with those  
336 filled white showing the 9 electrodes that comprised the region-of-interest (ROI) used for subsequent  
337 analyses.

338

339

340 We conducted separate 6 (condition) x 5 (modulation depth) repeated measures ANOVAs at  
341 each modulation frequency using the SNRs averaged across the ROI. At 40Hz, we found  
342 significant main effects of condition ( $F=28.21$ ,  $p<0.001$ ,  $\eta_p^2=0.72$ , GG corrected) and  
343 modulation depth ( $F=29.04$ ,  $p<0.001$ ,  $\eta_p^2=0.73$ , GG corrected), and a significant interaction  
344 between the two variables ( $F=6.96$ ,  $p<0.001$ ,  $\eta_p^2=0.39$ ). At 35Hz, we also found significant  
345 main effects of condition ( $F=14.87$ ,  $p<0.01$ ,  $\eta_p^2=0.58$ , GG corrected) and modulation depth  
346 ( $F=9.27$ ,  $p<0.01$ ,  $\eta_p^2=0.46$ , GG corrected), and a significant interaction between the two  
347 variables ( $F=5.97$ ,  $p<0.001$ ,  $\eta_p^2=0.35$ ).

348

349 SNRs are plotted as a function of modulation depth in Figure 5. For a single modulation  
350 frequency (40 Hz), responses increased monotonically with increasing modulation depth,  
351 with SNRs >2 evident for modulation depths above 12.5%. Binaural presentation (red  
352 squares in Figure 5a) achieved SNRs of around 7 at the highest modulation depth, whereas  
353 monaural modulation produced weaker signals of SNR~5 (blue circles in Figure 5a).  
354 Assuming a nominal baseline of SNR=1 in the absence of any signal, this represents a  
355 binaural increase in response of a factor of 1.5. In the dichotic condition (green diamonds in  
356 Figure 5a), a masker with a fixed 50% modulation depth presented to one ear produced an  
357 SNR of 4 when the unmodulated carrier was presented to the other ear (see left-most  
358 point). As the dichotic signal modulation increased, responses increased to match the  
359 binaural condition at higher signal modulations (red squares and green diamonds in Figure  
360 5a).

361

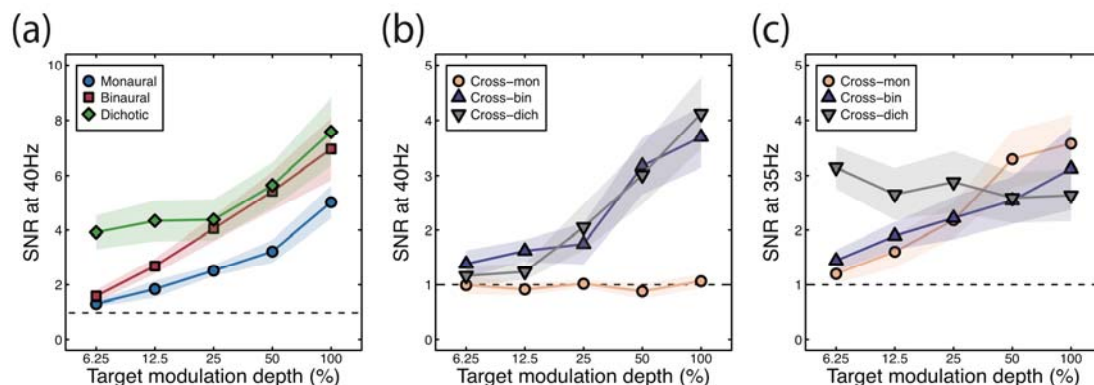

362

363 Figure 5: SNRs expressed as a function of signal modulation depth for six conditions at two frequencies.  
364 Shaded regions give  $\pm 1$ SE of the mean across participants ( $N=12$ ). The dashed horizontal line in each plot  
365 indicates the nominal baseline of SNR=1.

366

367 When the carrier presented to one ear was modulated at a different frequency (35 Hz),  
368 several differences were apparent for the three conditions. Monaural modulation at 35 Hz  
369 (the cross-mon condition) evoked no measureable responses at 40Hz as expected (orange  
370 circles in Figure 5b). At the modulation frequency of 35Hz, this condition produced a  
371 monotonically increasing function peaking around SNR=4 (orange circles in Figure 5c).  
372 Binaural modulation with different modulation frequencies in each ear led to weaker  
373 responses (SNRs of 4 at 40 Hz and 3 at 35 Hz; purple triangles in Figure 5b,c) than for  
374 binaural modulation at the same frequency (SNR=8, red squares in Figure 5a). A 35-Hz AM  
375 masker with a fixed 50% modulation depth presented to one ear produced little change in  
376 the response to a signal in the other ear, which was amplitude-modulated with a  
377 modulation frequency of 40Hz (grey inverted triangles in Figure 5b), though increasing the

378 signal modulation depth slightly reduced the neural response to the 35-Hz AM masker (grey  
379 inverted triangles in Figure 5c).

380

381 To summarise the EEG results, there is again evidence for weak interaural suppression  
382 owing to the non-overlapping monaural and binaural functions in Figure 5a, and the  
383 relatively modest masking effect in the cross-dichotic condition (grey inverted triangles in  
384 Figure 5b,c). We now consider model arrangements that are able to explain these results.

385

386 *A single model of signal combination predicts psychophysics and EEG results*

387

388 To further understand our results, we fit the model described by equation 1 to both data  
389 sets. To fit the psychophysical data, we calculated the target modulation depth that was  
390 necessary to increase the model response by a fixed value,  $\sigma_{40}$ , which was a fifth free  
391 parameter in the model (the other four free parameters being  $p$ ,  $q$ ,  $Z$  and  $\omega$ ; note that all  
392 parameters were constrained to be positive,  $q$  was constrained to always be greater than 2  
393 to ensure that the nonlinearity was strong enough to produce a dip, and we ensured that  
394  $p > q$ ). With five free parameters, the data were described extremely well (see Figure 6a),  
395 with a root mean square error (RMSE, calculated as the square root of the mean squared  
396 error between model and data points across all conditions displayed in a figure panel) of  
397 1.2 dB, which compares favourably to equivalent model fits in vision experiments [31].  
398 However, the value of the interaural suppression parameter was much less than 1 ( $\omega=0.02$ ,  
399 see Table 1). This weak interaural suppression changes the behaviour of the model shown in  
400 Figure 1c in two important ways, both of which are consistent with our empirical results.  
401 First, the degree of threshold elevation in the dichotic condition is much weaker, as is clear  
402 in the data (green diamonds in Figure 3, 6a). Second, the thresholds in the monaural  
403 condition are consistently higher than those in the binaural condition, even at high pedestal  
404 levels (compare blue circles and red squares in Figure 3, 6a).

405

406 To illustrate how the model behaves with stronger interaural suppression, we increased the  
407 weight to a value of  $\omega=1$ , but left the other parameters fixed at the values from the previous  
408 fit. This manipulation (shown in Figure 6b) reversed the changes caused by the weaker  
409 suppression – masking became stronger in the dichotic condition, and the monaural and  
410 binaural dipper handles converged at the higher pedestal levels. These changes provided a  
411 poorer description of human discrimination performance, with the RMSE increasing from  
412 1.2 dB to 5.5 dB. Finally, we held suppression constant (at  $\omega=1$ ), but permitted the other  
413 four parameters to vary in the fit. This somewhat improved the fit (see Figure 6c), but  
414 retained the qualitative shortcomings associated with strong interaural suppression, and  
415 only slightly improved the RMSE (from 5.5 dB to 4.6dB).

416

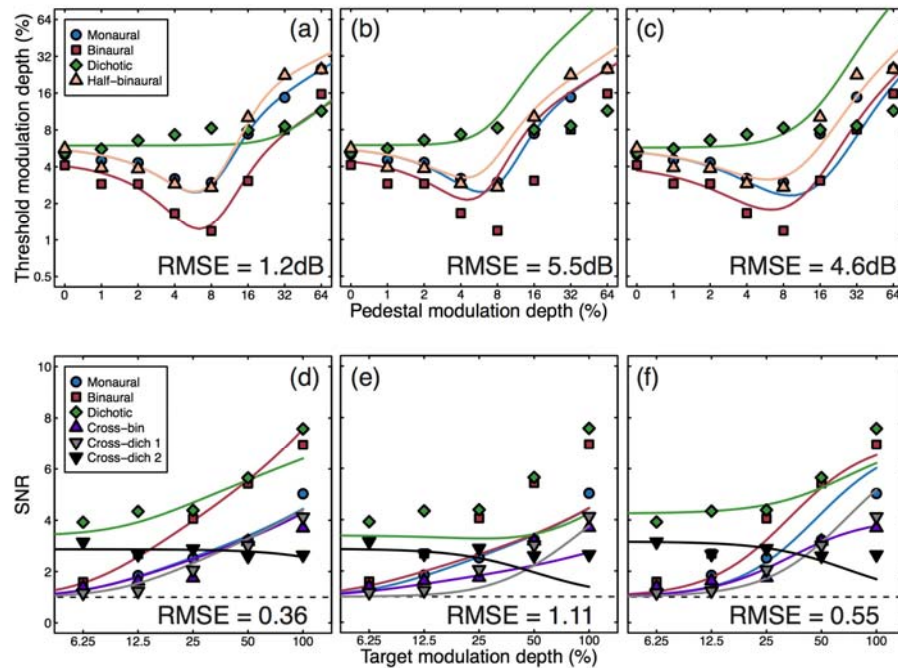

417  
418  
419  
420  
421  
422  
423  
424

Figure 6: Fits of several variants of the signal combination model (curves) to empirical data (symbols), as described in the text. The data in the top panels are the averaged dipper functions duplicated from panel 3d, and those in the lower row are collapsed across the three panels of Figure 5 (omitting the mon-cross condition). Values in the lower right of each plot give the root mean square error (RMSE) of the fit in logarithmic (dB) units in the upper panels, and in units of SNR in the lower panels.

Table 1: Parameters for the model fits shown in Figure 6 with parameter constraints as described in the text.

| Panel | $p$  | $q$  | $Z$   | $\sigma_{40}$ | $\sigma_{35}$ | $\omega$ | RMSE  |
|-------|------|------|-------|---------------|---------------|----------|-------|
| 6a    | 3.28 | 2.90 | 7.66  | 0.63          | -             | 0.02     | 1.2dB |
| 6b    | 3.28 | 2.90 | 7.66  | 0.63          | -             | 1        | 5.5dB |
| 6c    | 2.23 | 2.00 | 14.30 | 0.20          | -             | 1        | 4.6dB |
| 6d    | 2.49 | 2.00 | 9.39  | 2.73          | 3.50          | 0.05     | 0.36  |
| 6e    | 2.49 | 2.00 | 9.39  | 2.73          | 3.50          | 1        | 1.11  |
| 6f    | 2.00 | 2.00 | 47.26 | 0.16          | 0.24          | 1        | 0.55  |

425

426 To fit the EEG data, we converted the model response to an SNR by adding and dividing by  
427 the noise parameter ( $\sigma$ ). Because maximum SNRs varied slightly across the two modulation  
428 frequencies (40 and 35Hz, see Figure 5), we permitted this noise parameter to take a  
429 different value at each frequency ( $\sigma_{40}$  and  $\sigma_{35}$ ). Model predictions for the conditions  
430 described in Figure 2c are shown in Figure 6d for a version of the model with six free  
431 parameters. This produced an excellent fit [comparable to those for visual signals, see 32],  
432 which included the main qualitative features of the empirical amplitude response functions,  
433 with an RMSE of 0.36. The model captures the increased response to binaural modulations  
434 compared with monaural modulations (blue circles vs red squares in Figure 6d), the  
435 relatively modest suppression in the cross-bin (purple triangles) and cross-dichotic (grey  
436 triangles) conditions at 40 Hz relative to the monaural condition, and the gentle decline in  
437 SNR in the cross dichotic condition at the masker frequency (black triangles in Figure 6d).  
438 Most parameters took on comparable values to those for the dipper function fits described  
439 above. Of particular note, the weight of interaural suppression remained weak ( $\omega=0.05$ ).

440

441 We again explored the effect of increasing the weight of suppression (to  $\omega=1$ ) whilst  
442 keeping other parameters unchanged. This resulted in a reduction of amplitudes in the  
443 binaural and cross-binaural conditions, which worsened the fit (to an RMSE of 1.11).  
444 Permitting all other parameters to vary freely improved the fit (to RMSE=0.55), but there  
445 were still numerous shortcomings. In particular the monaural and binaural response  
446 functions were more similar than in the data, and the reduction in SNR in the cross-binaural  
447 and cross-dichoptic conditions was more extensive than found empirically.

448

449 Our modelling of the data from two experimental paradigms therefore support the  
450 empirical finding that interaural suppression is relatively weak (by more than an order of  
451 magnitude) compared with similar phenomena in vision (interocular suppression).

452

## 453 **Discussion**

454

455 We have presented converging evidence from two experimental paradigms (psychophysics  
456 and steady-state EEG) concerning the architecture of the human binaural auditory system. A  
457 single computational model, in which signals from the two ears inhibit each other weakly  
458 before being combined, provided the best description of data sets from both experiments.  
459 This model architecture originates from work on binocular vision, showing a commonality  
460 between these two sensory systems. We now discuss these results in the context of related  
461 empirical results, previous binaural models, and ecological constraints that differentially  
462 affect vision and hearing.

463

### 464 *A unified framework for understanding binaural processing*

465

466 Our psychophysical experiment replicates the classical finding [1,6–9] of slightly less than 3  
467 dB of summation at detection threshold (here 2.14 dB) using amplitude-modulated stimuli.  
468 This is somewhat weaker than is typically reported for binocular summation of contrast in  
469 vision, where summation ratios of 3-6 dB are typical. One explanation for this is a stronger  
470 early nonlinearity before signal combination, because the amount of summation is given by  
471  $2^{1/m}$ , where  $m$  is the sum of all exponents before signal combination [37]. Indeed, the best  
472 fitting model numerator exponent for the psychophysical data was 3.28 (see Table 1), much  
473 higher than the value of around 1.3 often used in vision [31], but consistent with previous  
474 hearing studies [7].

475

476 Above threshold, this difference persisted, with monaural stimulation producing higher  
477 discrimination thresholds (Figure 3) and weaker EEG responses (Figures 4, 5) than binaural  
478 stimulation. This is consistent with previous EEG work [17,21], and also the finding that  
479 perceived loudness and modulation depth are higher for binaural than monaural  
480 presentation [11–14,26]. However, these auditory effects are dramatically different from  
481 the visual domain, where both discrimination performance and perceived contrast are  
482 invariant of the number of eyes stimulated [30]. We discuss possible reasons for this  
483 modality difference below.

484

485 Suppression between the ears has been measured previously with steady-state  
486 magnetoencephalography (MEG) using amplitude-modulated stimuli of different

487 frequencies in the left and right ears [22,23]. This is equivalent to the cross-binaural and  
488 cross-dichotic conditions from the EEG experiment reported here, though we observed  
489 somewhat less suppression than in the MEG studies. This difference could be due to the  
490 hemispheric differences reported in both MEG studies, the source localisation technique  
491 they used, or differences in the modulation frequencies across studies.

492  
493 Another widely-studied phenomenon that might involve suppression between the ears is  
494 the binaural masking level difference [BMLD; 38]. In this paradigm, a signal embedded in  
495 noise is detected more easily when either the signal or the noise in one ear is inverted in  
496 phase [39]. Contemporary explanations of this effect [40,41] invoke cross-correlation of  
497 binaural signals, but lack explicit inhibition between masker and test signals. However, more  
498 elaborate versions of the model described here include mechanisms tuned to opposite  
499 spatial phases of sine-wave grating stimuli [42], and a similar approach in the temporal  
500 domain might be capable of predicting BMLD effects. Alternatively, since the BMLD  
501 phenomenon involves segmentation of target and masker, it might be more akin to  
502 'unmasking' effects that occur in vision when stimuli are presented in different depth planes  
503 [43,44]. Modelling such effects would likely require additional mechanisms representing  
504 different spatial locations, far beyond the scope of the architecture proposed here.

505

506 *The model shares features with previous binaural models*

507

508 An influential model of binaural loudness perception [45,46] has some architectural  
509 similarities to the model shown in Figure 1a. For example, recent implementations  
510 incorporate binaural inhibition across multiple timescales [45]. However this model was  
511 designed with a focus on explaining perception of loudness across a range of frequencies  
512 (and for inputs of arbitrary frequency content), rather than attempting to understand  
513 performance on tasks (i.e. increment detection thresholds) or the precise mapping between  
514 stimulus and cortical response (i.e. the amplitude response functions measured using  
515 steady-state EEG). At threshold it predicts minimal levels of binaural summation (~1dB) in  
516 line with probabilistic combination of inputs [46], but below that found experimentally. The  
517 model would therefore likely require modification (i.e. the inclusion of physiological  
518 summation and early nonlinearities) to explain the data here, though it is possible that such  
519 modifications could be successful, given the other similarities between the models.

520

521 Several previous neural models of binaural processing have focussed on excitatory and  
522 inhibitory processes of neurons in subcortical auditory structures such as the lateral  
523 superior olive. These models (reviewed in Colburn, 1996) are concerned with lateralised  
524 processing, in which interaural interactions are purely inhibitory, and so do not typically  
525 feature excitatory summation. However, models of inferior colliculus neurons do typically  
526 involve binaural summation, and have the same basic structure as the architecture shown in  
527 Figure 1a. In general these models are designed to explain responses to diotically  
528 asynchronous stimuli, and so typically feature asymmetric delays across the excitatory and  
529 inhibitory inputs from the two ears [e.g. 47]. Since a time delay is not a critical component  
530 of the divisive suppression on the denominator of equation 1, and because a mechanism  
531 with broad temporal tuning is equivalent to the envelope of many mechanisms with  
532 different delays, the architecture proposed here can be considered a generalised case of  
533 such models.

534

535 *Ecological constraints on vision and hearing*

536

537 This study reveals an important but subtle difference between hearing and vision –  
538 suppression between the ears is far weaker than suppression between the eyes. Why  
539 should this be so? In the visual domain, the brain attempts to construct a unitary percept of  
540 the visual environment from two overlapping inputs, termed binocular single vision. For  
541 weak signals (at detection threshold) it is beneficial to sum the two inputs to improve the  
542 signal-to-noise ratio. But above threshold, there is no advantage for a visual object to  
543 appear more intense when viewed with two eyes compared with one. The strong  
544 interocular suppression prevents this from occurring by normalizing the signals from the left  
545 and right eyes to achieve ‘ocularity invariance’ – the constancy of perception through one or  
546 both eyes [30].

547

548 In the human auditory system the ears are placed laterally, maximising the disparity  
549 between the signals received (and minimising overlap). This incurs benefits when  
550 determining the location of lateralised sound sources, though reporting the location of pure  
551 tone sources at the midline (i.e. directly in front or behind) is very poor [2]. Hearing a sound  
552 through both ears at once therefore does not necessarily provide information that it comes  
553 from a single object, and so the principle of invariance should not be applied (and interaural  
554 suppression should be weak). However other cues that signals come from a single auditory  
555 object (for example interaural time and level differences consistent with a common  
556 location) should result in strong suppression, and cues that signals come from multiple  
557 auditory objects should release that suppression. This is the essence of the BMLD effects  
558 discussed above – suppression is strongest when target and masker have the same phase  
559 offsets (consistent with a common source), and weakest when their phase offsets are  
560 different. The distinct constraints placed on the visual and auditory systems therefore result  
561 in different requirements, which are implemented in a common architecture by changing  
562 the weight of suppression between channels.

563

## 564 **Conclusions**

565

566 A combination of psychophysical and electrophysiological experiments, and computational  
567 modelling have converged on an architecture for the binaural fusion of amplitude-  
568 modulated tones. This architecture is identical to the way that visual signals are combined  
569 across the eyes, with the exception that the weight of suppression between the ears is  
570 weaker than that between the eyes. This is likely because the ecological constraints  
571 governing suppression of multiple sources aim to avoid signals from a common source being  
572 over-represented. Such a high level of consistency across sensory modalities is unusual, and  
573 illustrates how the brain can adapt generic neural circuits to meet the demands of a specific  
574 situation.

575

576

577

578

579

580



581 **References**

582

583 1. Shaw WA, Newman EB, Hirsh IJ. 1947 The difference between monaural and binaural  
584 thresholds. *J. Exp. Psychol.* **37**, 229–242.

585 2. Rayleigh, Lord. 1907 XII. On our perception of sound direction. *Philos. Mag. Ser. 6* **13**,  
586 214–232. (doi:10.1080/14786440709463595)

587 3. Kolarik AJ, Cirstea S, Pardhan S, Moore BCJ. 2014 A summary of research investigating  
588 echolocation abilities of blind and sighted humans. *Hear. Res.* **310**, 60–68.  
589 (doi:10.1016/j.heares.2014.01.010)

590 4. Thaler L, Arnott SR, Goodale MA. 2011 Neural Correlates of Natural Human Echolocation  
591 in Early and Late Blind Echolocation Experts. *PLoS ONE* **6**, e20162.  
592 (doi:10.1371/journal.pone.0020162)

593 5. Rowan D, Papadopoulos T, Edwards D, Allen R. 2015 Use of binaural and monaural cues  
594 to identify the lateral position of a virtual object using echoes. *Hear. Res.* **323**, 32–39.  
595 (doi:10.1016/j.heares.2015.01.012)

596 6. Babkoff H, Gombosh D. 1976 Monaural and binaural temporal integration of noise  
597 bursts. *Psychol. Res.* **39**, 137–145.

598 7. Heil P. 2014 Towards a Unifying Basis of Auditory Thresholds: Binaural Summation. *J.*  
599 *Assoc. Res. Otolaryngol.* **15**, 219–234. (doi:10.1007/s10162-013-0432-x)

600 8. Pollack I. 1948 Monaural and Binaural Threshold Sensitivity for Tones and for White  
601 Noise. *J. Acoust. Soc. Am.* **20**, 52–57. (doi:10.1121/1.1906347)

602 9. Hirsh IJ. 1948 Binaural summation; a century of investigation. *Psychol. Bull.* **45**, 193–206.

603 10. Jesteadt W, Wier CC. 1977 Comparison of monaural and binaural discrimination of  
604 intensity and frequency. *J. Acoust. Soc. Am.* **61**, 1599–1603. (doi:10.1121/1.381446)

605 11. Fletcher H, Munson WA. 1933 Loudness, Its Definition, Measurement and Calculation. *J.*  
606 *Acoust. Soc. Am.* **5**, 82–108. (doi:10.1121/1.1915637)

607 12. Hellman RP, Zwislocki J. 1963 Monaural Loudness Function at 1000 cps and Interaural  
608 Summation. *J. Acoust. Soc. Am.* **35**, 856–865. (doi:10.1121/1.1918619)

609 13. Reynolds GS, Stevens SS. 1960 Binaural Summation of Loudness. *J. Acoust. Soc. Am.* **32**,  
610 1337–1344. (doi:10.1121/1.1907903)

611 14. Treisman M, Irwin RJ. 1967 Auditory Intensity Discriminal Scale I. Evidence Derived from  
612 Binaural Intensity Summation. *J. Acoust. Soc. Am.* **42**, 586–592. (doi:10.1121/1.1910626)

613 15. Mäkelä J., Hari R. 1987 Evidence for cortical origin of the 40 Hz auditory evoked  
614 response in man. *Electroencephalogr. Clin. Neurophysiol.* **66**, 539–546.  
615 (doi:10.1016/0013-4694(87)90101-5)

- 616 16. Picton TW, Vajsar J, Rodriguez R, Campbell KB. 1987 Reliability estimates for steady-  
617 state evoked potentials. *Electroencephalogr. Clin. Neurophysiol. Potentials Sect.* **68**,  
618 119–131. (doi:10.1016/0168-5597(87)90039-6)
- 619 17. Rees A, Green GG, Kay RH. 1986 Steady-state evoked responses to sinusoidally  
620 amplitude-modulated sounds recorded in man. *Hear. Res.* **23**, 123–133.
- 621 18. Ross B, Borgmann C, Draganova R, Roberts LE, Pantev C. 2000 A high-precision  
622 magnetoencephalographic study of human auditory steady-state responses to  
623 amplitude-modulated tones. *J. Acoust. Soc. Am.* **108**, 679–691. (doi:10.1121/1.429600)
- 624 19. Kuwada S, Batra R, Maher VL. 1986 Scalp potentials of normal and hearing-impaired  
625 subjects in response to sinusoidally amplitude-modulated tones. *Hear. Res.* **21**, 179–  
626 192.
- 627 20. Farahani ED, Goossens T, Wouters J, van Wieringen A. 2017 Spatiotemporal  
628 reconstruction of auditory steady-state responses to acoustic amplitude modulations:  
629 Potential sources beyond the auditory pathway. *NeuroImage* **148**, 240–253.  
630 (doi:10.1016/j.neuroimage.2017.01.032)
- 631 21. Poelmans H, Luts H, Vandermosten M, Ghesquière P, Wouters J. 2012 Hemispheric  
632 Asymmetry of Auditory Steady-State Responses to Monaural and Diotic Stimulation. *J.*  
633 *Assoc. Res. Otolaryngol.* **13**, 867–876. (doi:10.1007/s10162-012-0348-x)
- 634 22. Fujiki N, Jousmaki V, Hari R. 2002 Neuromagnetic responses to frequency-tagged  
635 sounds: a new method to follow inputs from each ear to the human auditory cortex  
636 during binaural hearing. *J. Neurosci. Off. J. Soc. Neurosci.* **22**, RC205.
- 637 23. Kaneko K, Fujiki N, Hari R. 2003 Binaural interaction in the human auditory cortex  
638 revealed by neuromagnetic frequency tagging: no effect of stimulus intensity. *Hear. Res.*  
639 **183**, 1–6. (doi:10.1016/S0378-5955(03)00186-2)
- 640 24. Danilenko L. 1969 Binaural hearing in non-stationary diffuse sound field (in German).  
641 *Kybernetik* **6**, 50–57.
- 642 25. Zahorik P, Kim DO, Kuwada S, Anderson PW, Brandewie E, Collecchia R, Srinivasan N.  
643 2013 Amplitude modulation detection by human listeners in reverberant sound fields:  
644 Carrier bandwidth effects and binaural versus monaural comparison. pp. 050002–  
645 050002. (doi:10.1121/1.4733848)
- 646 26. Ozimek E, Konieczny J, Sone T. 2008 Binaural perception of the modulation depth of AM  
647 signals. *Hear. Res.* **235**, 125–133. (doi:10.1016/j.heares.2007.10.008)
- 648 27. Rutschmann J, Rubinstein L. 1965 Binaural Beats and Binaural Amplitude-Modulated  
649 Tones: Successive Comparison of Loudness Fluctuations. *J. Acoust. Soc. Am.* **38**, 759–  
650 768. (doi:10.1121/1.1909802)
- 651 28. Wojtczak M, Viemeister NF. 1999 Intensity discrimination and detection of amplitude  
652 modulation. *J. Acoust. Soc. Am.* **106**, 1917–1924. (doi:10.1121/1.427940)

- 653 29. McGill WJ, Goldberg JP. 1968 A study of the near-miss involving Weber's law and pure-  
654 tone intensity discrimination. *Percept. Psychophys.* **4**, 105–109.  
655 (doi:10.3758/BF03209518)
- 656 30. Baker DH, Meese TS, Georgeson MA. 2007 Binocular interaction: contrast matching and  
657 contrast discrimination are predicted by the same model. *Spat. Vis.* **20**, 397–413.  
658 (doi:10.1163/156856807781503622)
- 659 31. Meese TS, Georgeson MA, Baker DH. 2006 Binocular contrast vision at and above  
660 threshold. *J. Vis.* **6**, 7–7. (doi:10.1167/6.11.7)
- 661 32. Baker DH, Wade AR. 2017 Evidence for an Optimal Algorithm Underlying Signal  
662 Combination in Human Visual Cortex. *Cereb. Cortex* **27**, 254–264.  
663 (doi:10.1093/cercor/bhw395)
- 664 33. Ewert SD, Dau T. 2004 External and internal limitations in amplitude-modulation  
665 processing. *J. Acoust. Soc. Am.* **116**, 478–490. (doi:10.1121/1.1737399)
- 666 34. Viemeister NF. 1979 Temporal modulation transfer functions based upon modulation  
667 thresholds. *J. Acoust. Soc. Am.* **66**, 1364–1380. (doi:10.1121/1.383531)
- 668 35. Legge GE, Foley JM. 1980 Contrast masking in human vision. *J. Opt. Soc. Am.* **70**, 1458–  
669 1471.
- 670 36. Tyler CW, Chen CC. 2000 Signal detection theory in the 2AFC paradigm: attention,  
671 channel uncertainty and probability summation. *Vision Res.* **40**, 3121–3144.
- 672 37. Baker DH, Wallis SA, Georgeson MA, Meese TS. 2012 Nonlinearities in the binocular  
673 combination of luminance and contrast. *Vision Res.* **56**, 1–9.  
674 (doi:10.1016/j.visres.2012.01.008)
- 675 38. Webster FA. 1951 The Influence of Interaural Phase on Masked Thresholds I. The Role of  
676 Interaural Time-Deviation. *J. Acoust. Soc. Am.* **23**, 452–462. (doi:10.1121/1.1906787)
- 677 39. Hirsh IJ. 1948 The Influence of Interaural Phase on Interaural Summation and Inhibition.  
678 *J. Acoust. Soc. Am.* **20**, 536–544. (doi:10.1121/1.1906407)
- 679 40. Colburn HS. 1996 Computational Models of Binaural Processing. In *Auditory*  
680 *Computation* (eds HL Hawkins, TA McMullen, AN Popper, RR Fay), pp. 332–400. New  
681 York, NY: Springer New York. (doi:10.1007/978-1-4612-4070-9\_8)
- 682 41. Gilbert HJ, Shackleton TM, Krumbholz K, Palmer AR. 2015 The Neural Substrate for  
683 Binaural Masking Level Differences in the Auditory Cortex. *J. Neurosci.* **35**, 209–220.  
684 (doi:10.1523/JNEUROSCI.1131-14.2015)
- 685 42. Georgeson MA, Wallis SA, Meese TS, Baker DH. 2016 Contrast and lustre: A model that  
686 accounts for eleven different forms of contrast discrimination in binocular vision. *Vision*  
687 *Res.* **129**, 98–118. (doi:10.1016/j.visres.2016.08.001)

- 688 43. Moraglia G, Schneider B. 1990 Effects of direction and magnitude of horizontal  
689 disparities on binocular unmasking. *Perception* **19**, 581–593. (doi:10.1068/p190581)
- 690 44. Wardle SG, Cass J, Brooks KR, Alais D. 2010 Breaking camouflage: Binocular disparity  
691 reduces contrast masking in natural images. *J. Vis.* **10**, 38–38. (doi:10.1167/10.14.38)
- 692 45. Moore BCJ, Glasberg BR, Varathanathan A, Schlittenlacher J. 2016 A Loudness Model for  
693 Time-Varying Sounds Incorporating Binaural Inhibition. *Trends Hear.* **20**,  
694 233121651668269. (doi:10.1177/2331216516682698)
- 695 46. Moore BCJ, Glasberg BR. 2007 Modeling binaural loudness. *J. Acoust. Soc. Am.* **121**,  
696 1604–1612. (doi:10.1121/1.2431331)
- 697 47. Sujaku Y, Kuwada S, Yin TCT. 1981 Binaural Interaction in the Cat Inferior Colliculus:  
698 Comparison of the Physiological Data with a Computer Simulated Model. In *Neuronal*  
699 *Mechanisms of Hearing* (eds J Syka, L Aitkin), pp. 233–238. Boston, MA: Springer US.  
700 (doi:10.1007/978-1-4684-3908-3\_24)
- 701
- 702
